# Supplementary material for: A novel supramolecular polymer fabricated via stronger hydrogen-bonding interactions between substituted amide groups: design, synthesis, properties and mechanism
Source: Royal Society of Chemistry journal article supplement (doi:10.1039/c5ra10876d), 2015-01-01
Supplement: c5ra10876d1.pdf [file c5ra10876d1.pdf]

## Supporting Information

# Novel Supramolecular Polymer Fabricated via Stronger Hydrogen-Bonding Interactions between Substituted Amide Groups: Design, Synthesis, Properties and Mechanism

Ze-Hui Dai, Lu Qiang, Liming Tang\*, Bao-Hua Guo

(Laboratory of Advanced Materials, Department of Chemical Engineering, Tsinghua University, Beijing 100084)

### Synthesis of di(2-pyridine carbaldehyde)-hexanediohydrazide (DPCH) from adipic dihydrazide (ADH)

DPCH was synthesized through a one-step reaction process as indicated in Scheme S1.

The solution of 2-pyridinecarboxaldehyde (**2**) (6.42 g, 60.0 mmol) in ethanol (20 mL) was dropped into the suspension of adipic dihydrazide (ADH) (3.44 g, 20.0 mmol) with a drop of acetic acid in ethanol (50 mL) and the reaction was conducted at room temperature for 20 hrs. After filtration, the powder was washed by ethanol and water for two times to remove the unreacted 2-pyridinecarboxaldehyde and adipic dihydrazide. Then the white powder was dried in vacuum at 50 °C for 10 hours to remove any residual solvent and white powder of di(2-pyridine carbaldehyde)-hexanediohydrazide (DPCH) (5.04 g, in 72.0% yield) was obtained.

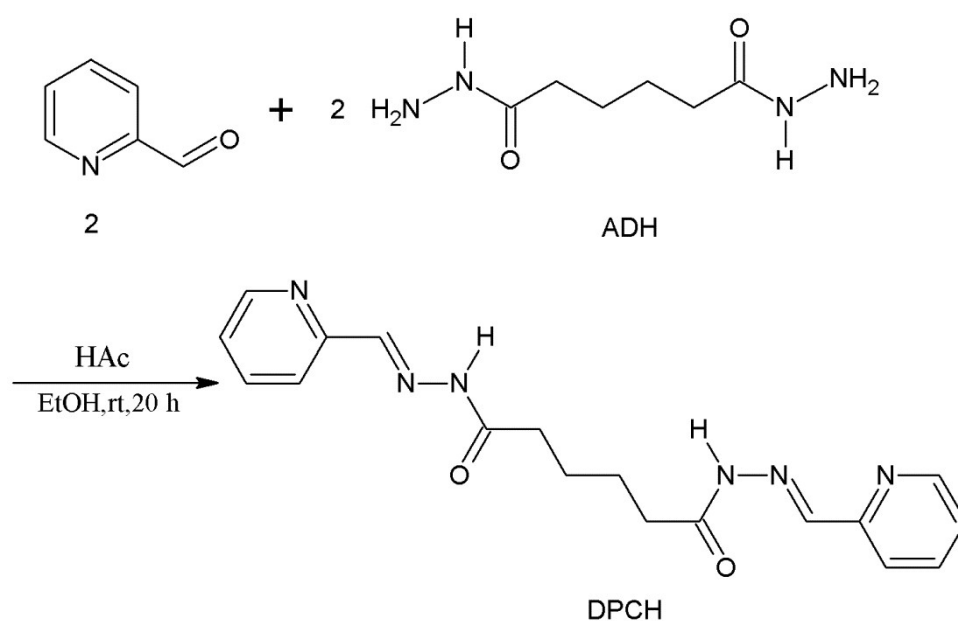

**Scheme S1.** Synthetic procedure of DPCH.

The structure of DPCH was confirmed  $^1\text{H-NMR}$ .  $^1\text{H-NMR}$  (DMSO- $\text{D}_6$ , 300 MHz,  $\delta/\text{ppm}$ , Fig. S1): 1.63~2.67 (m, 8H, H atoms in the solid boxes, g), 7.01 (m, 2H, b), 7.87~7.99 (m, 4H, c and d), 8.15 (s, 2H, a), 8.45 (d, 2H, e), 11.46 (d, 2H, f). The disappearance of peaks at 4.1 ppm and 8.9 ppm also confirms that DPCH has been successfully prepared without ADH left.  $^1\text{H-NMR}$  (DMSO- $\text{D}_6$ ) of adipic dihydrazide ( $\text{M}_2$ ) was got from Reference S1.

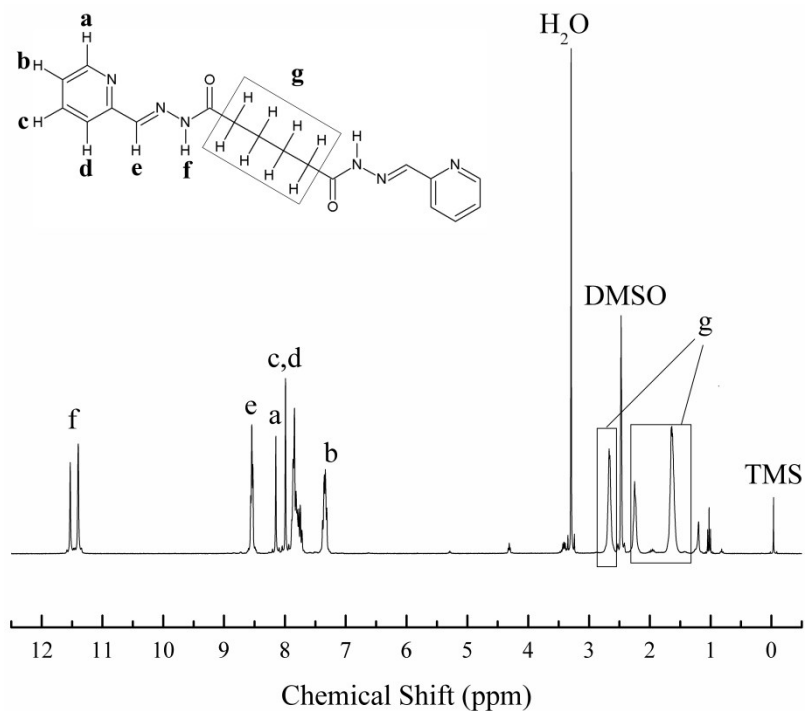

**Fig.S1**  $^1\text{H-NMR}$  spectrum of **DPCH**.

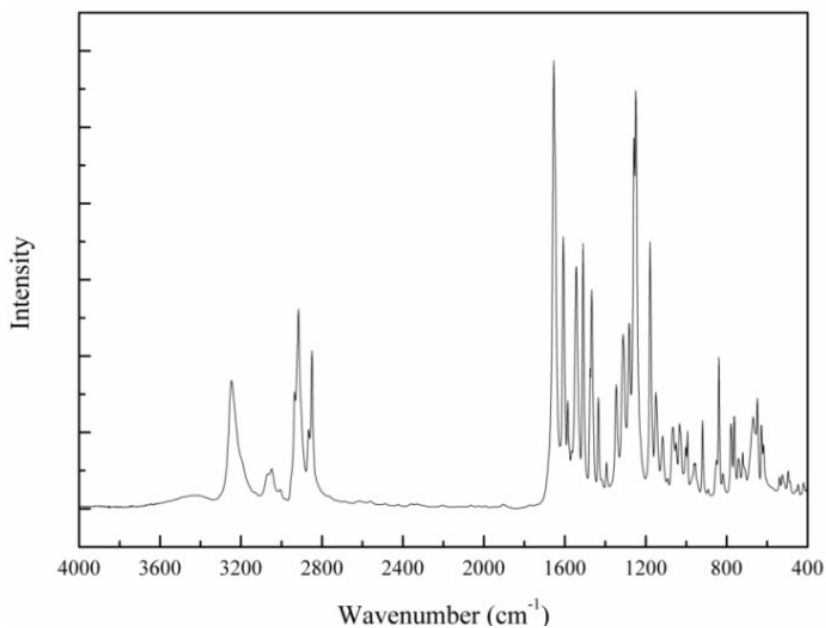

**Fig.S2** FT-IR spectrum of monomer **DPCHP-DODE**.

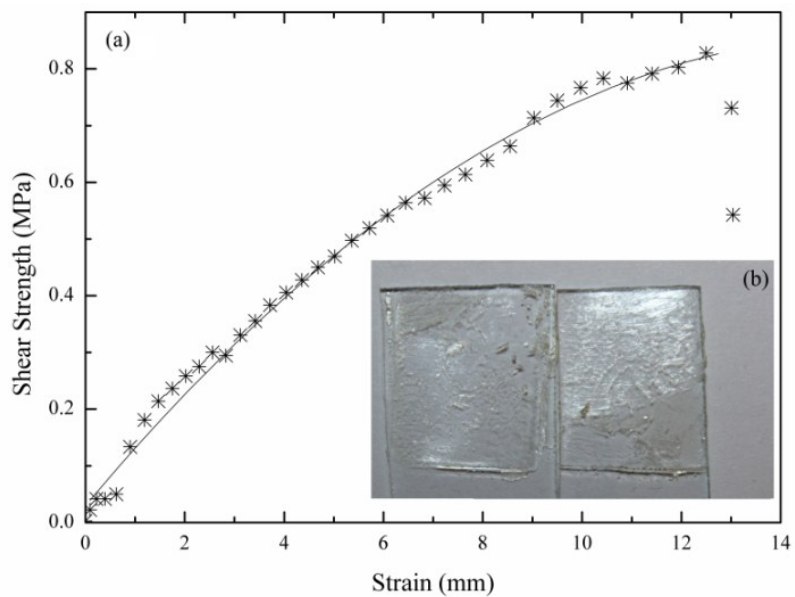

**Fig.S3** (a) Shear test of lap joints for regular glasses bonded with **DPCHP-DODE<sub>110</sub>** and (b) cohesive failure for regular glasses bonded with **DPCHP-DODE<sub>110</sub>** after shear test.

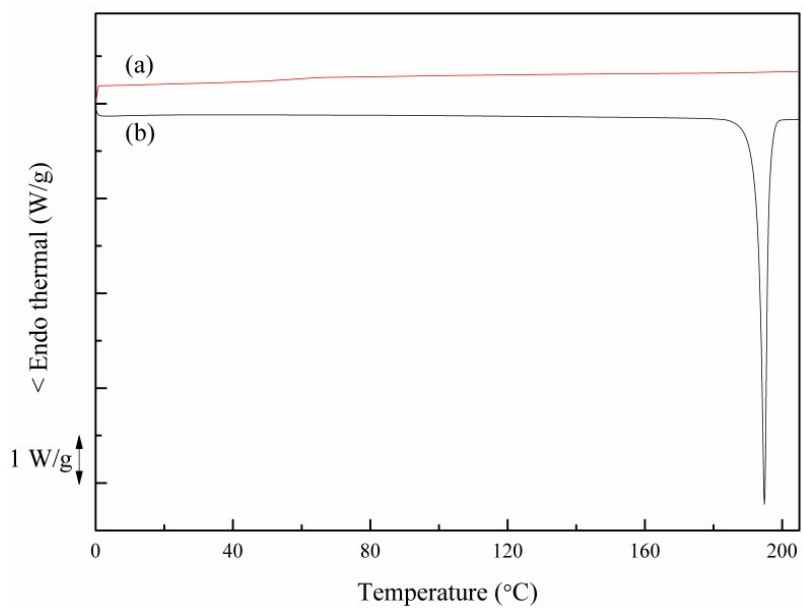

**Fig.S4** DSC curves of the (a) cooling process and (b) first heating process for monomer **DPCHP-DODE**.

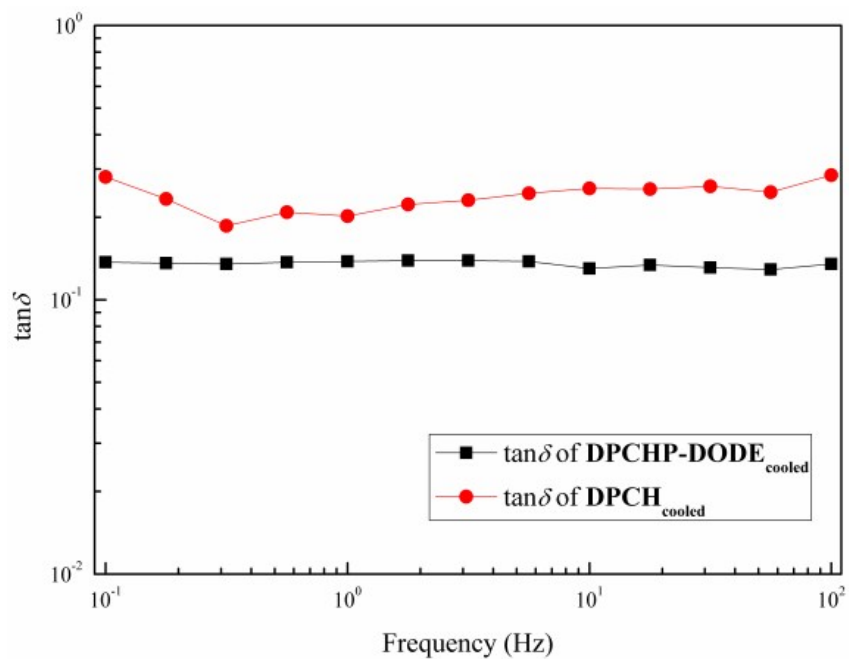

**Fig.S5**  $\tan\delta$  of DPCHP-DODE<sub>cooled</sub> and DPCH<sub>cooled</sub>.

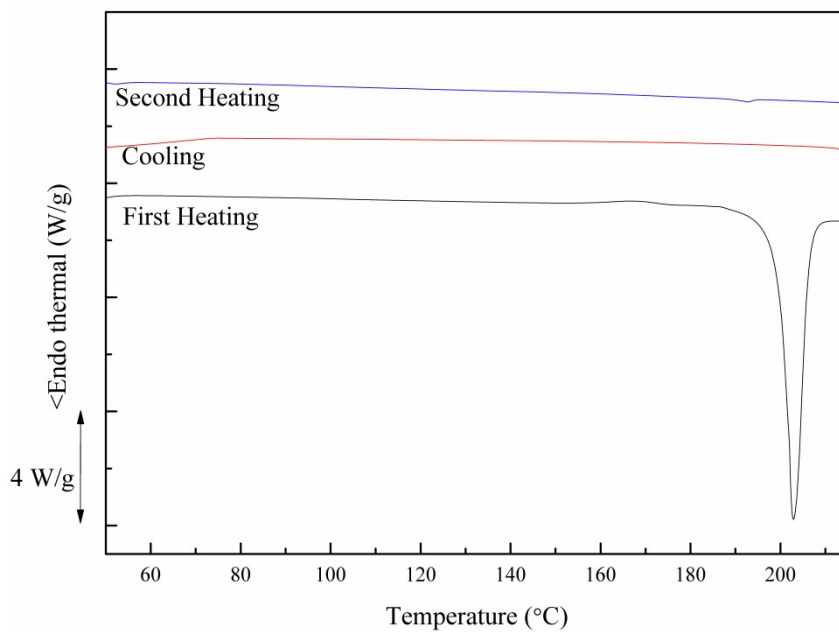

**Fig. S6** DSC curves for the first heating, cooling and second heating process of DPCH.

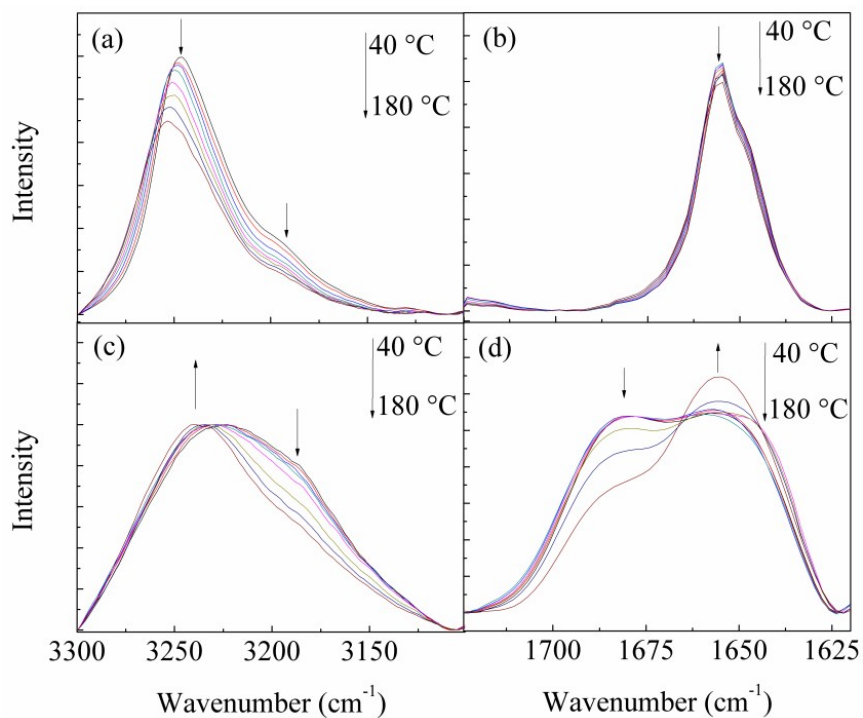

**Fig.S7** FT-IR spectra of **DPCHP-DODE** from 40 to 180 °C ranged (a) from 3300 to 3100  $\text{cm}^{-1}$  and (b) from 1725 to 1625  $\text{cm}^{-1}$ , and **DPCHP-DODE<sub>110</sub>** from 40 to 180 °C ranged (c) from 3300 to 3100  $\text{cm}^{-1}$  and (d) from 1725 to 1625  $\text{cm}^{-1}$ .

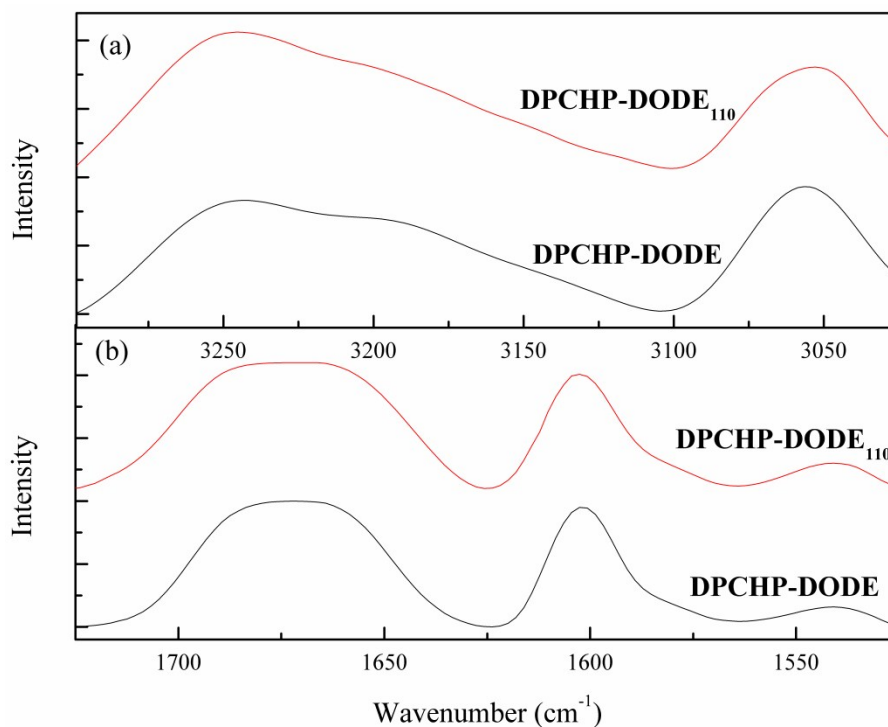

**Fig.S8** FT-IR spectra of **DPCHP-DODE** and **DPCHP-DODE<sub>110</sub>** at 220 °C ranged (a) from 3300 to 2980  $\text{cm}^{-1}$  and (b) from 1725 to 1525  $\text{cm}^{-1}$ .

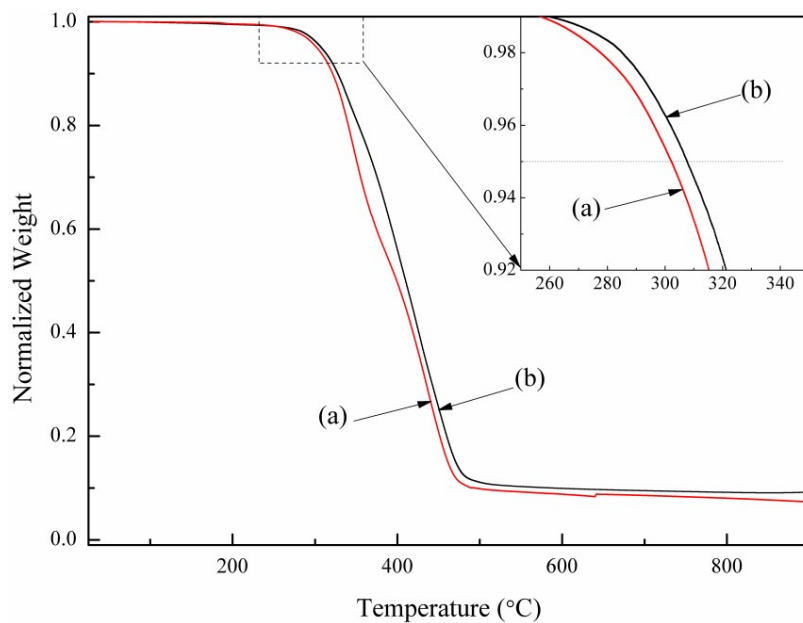

**Fig.S9** TGA curves of (a) **DPCHP-DODE** and (b) **DPCHP-DODE<sub>110</sub>**.

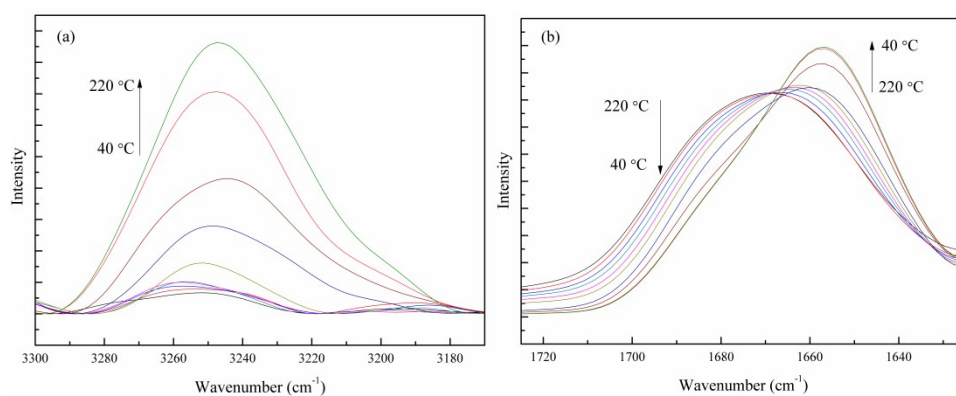

**Fig.S10** FT-IR spectra of **DPCHP-DODE** in the cooling process ranged (a) from 3300 to 3170  $\text{cm}^{-1}$  and (b) from 1725 to 1625  $\text{cm}^{-1}$ .

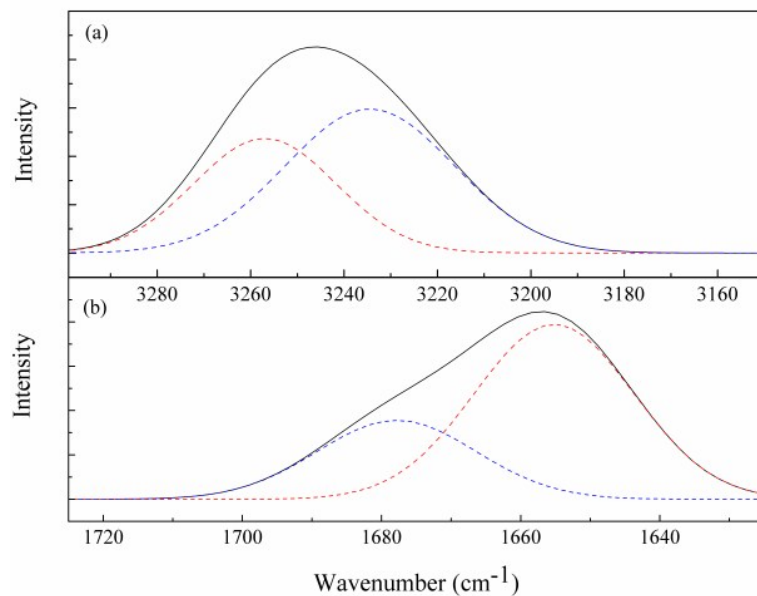

**Fig. S11** FT-IR spectra ranged (a) from 3300 to 3150  $\text{cm}^{-1}$  and (b) from 1725 to 1625  $\text{cm}^{-1}$  of **DPCHP-DODE** at 40 °C cooled from the melt in KBr sheet.

---

## References

S1 AIST: Integrated Spectral Database System of Organic Compounds. (Data were obtained from the National Institute of Advanced Industrial Science and Technology (Japan)).
